# Supplementary material for: Facile synthesis of a highly efficient Co/Cu@NC catalyst for base-free oxidation of alcohols to esters
Source: Royal Society of Chemistry journal article supplement (doi:10.1039/d0nj00172d), 2020-01-01
Supplement: d0nj00172d1.pdf [file d0nj00172d1.pdf]

## Supplementary Information

### Facile Synthesis of Highly Efficient Co/Cu@NC Catalyst for Base-free

### Oxidation of Alcohols to Esters

Jiusheng Jiang, Xiang Li, Shengyu Du, Langchen Shi, Pingping Jiang, Pingbo Zhang,

Yuming Dong, Yan Leng\*

School of Chemical and Material Engineering, Jiangnan University, Lihu Road 1800#,

Wuxi 214122, Jiangsu, China.

E-mail: yanleng@jiangnan.edu.cn.

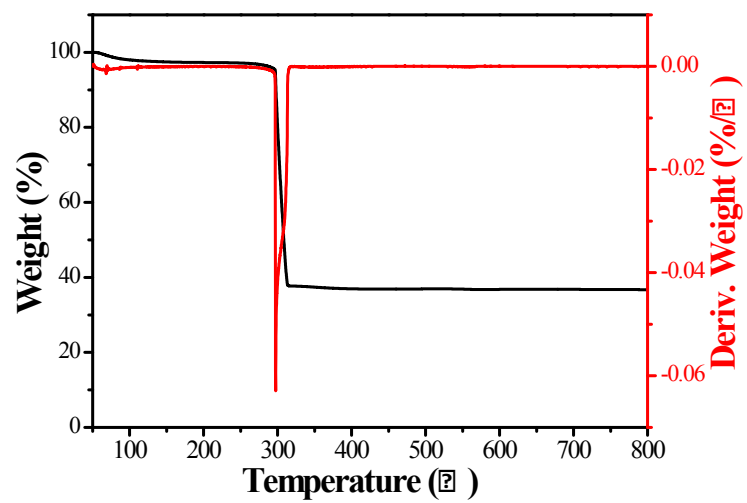

Fig. S1 TGA curves of CoCu@NC<sub>2</sub>.

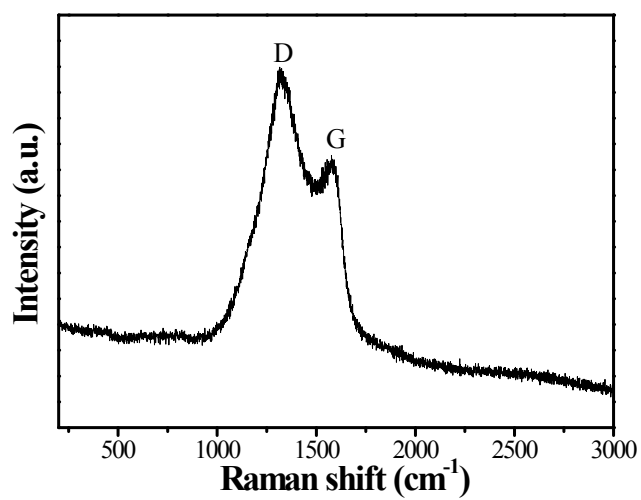

Fig. S2 Raman pattern of CoCu@NC<sub>2</sub>.

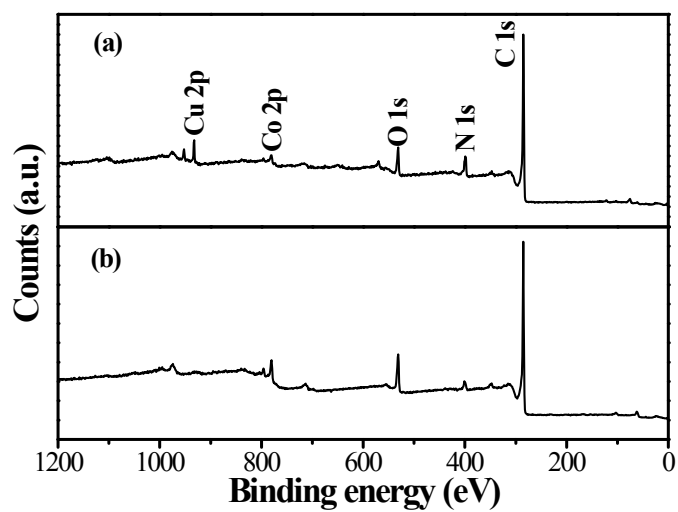

**Fig. S3** XPS survey spectra of (a) CoCu@NC<sub>2</sub> (b) Co@NC<sub>2</sub>.

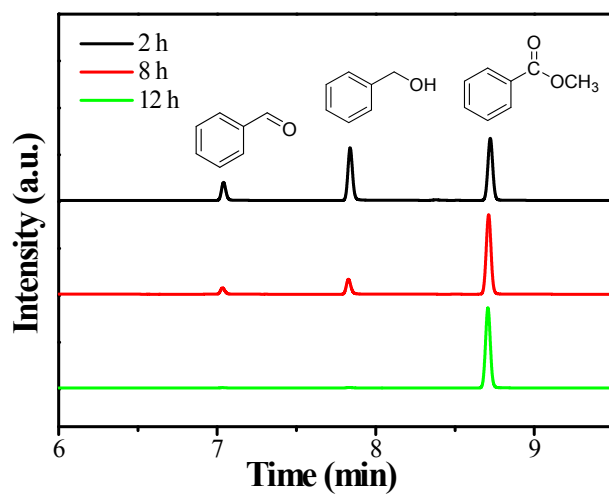

**Fig. S4** GC spectra for Oxidative Esterification of Benzyl Alcohol over CoCu@NC<sub>2</sub>

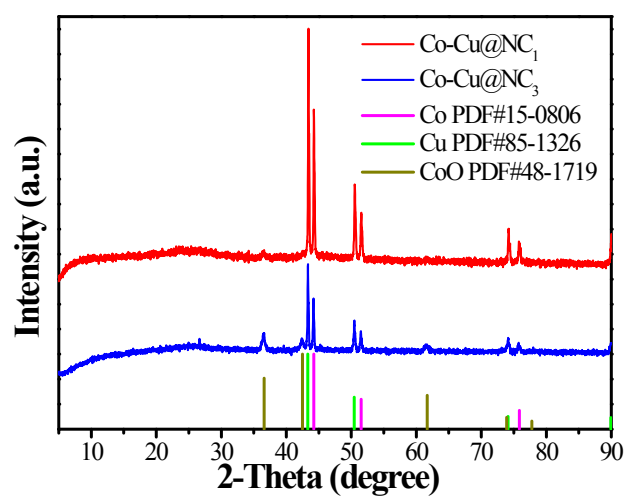

Fig. S5 XRD patterns of CoCu@NC<sub>1</sub> and CoCu@NC<sub>3</sub>.

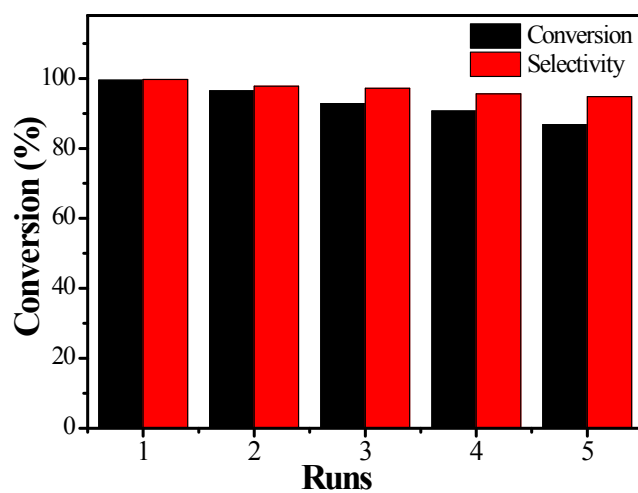

Fig. S6 Catalytic reusability of CoCu@NC<sub>2</sub> for oxidative esterification of benzyl alcohol

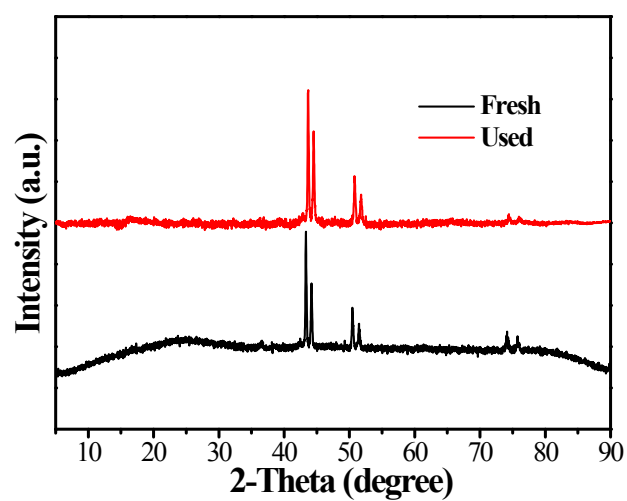

**Fig. S7** XRD patterns of fresh and recycled CoCu@NC<sub>2</sub>.

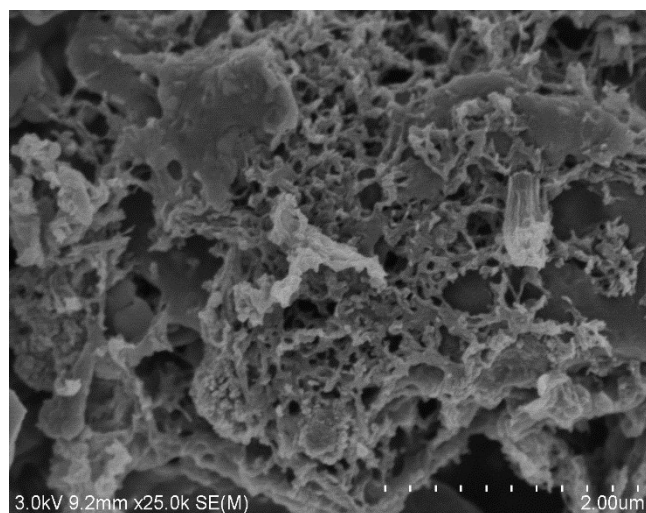

**Fig. S8** SEM images of CoCu@NC<sub>2</sub>.

**Table S1: Comparative performance of CoCu@NC<sub>2</sub> catalyst with prior reported art.**

| Catalyst                               | Condition                                                                  | Conv./Yield(%) | Select. (%) | Ref.                |
|----------------------------------------|----------------------------------------------------------------------------|----------------|-------------|---------------------|
| NaAuCl <sub>4</sub> ·2H <sub>2</sub> O | 1 atm O <sub>2</sub> , 80°C, 5 h, K <sub>2</sub> CO <sub>3</sub>           | 98             | 99          | 1                   |
| Co–CoO@NC                              | 1 bar O <sub>2</sub> , 80°C, 12 h, K <sub>2</sub> CO <sub>3</sub>          | 100            | 100         | 2                   |
| Co@NC                                  | 1 bar O <sub>2</sub> , 80°C, 20 h, K <sub>2</sub> CO <sub>3</sub>          | 100            | 98          | 3                   |
| Co <sub>3</sub> O <sub>4</sub> -N@C    | 1 bar O <sub>2</sub> , 60°C, 24 h, K <sub>2</sub> CO <sub>3</sub>          | 99             | 97          | 4                   |
| Co <sub>3</sub> O <sub>4</sub> /NGr@C  | 1 bar O <sub>2</sub> , 60°C, 24 h, K <sub>2</sub> CO <sub>3</sub>          | 97             | --          | 5                   |
| NCI-Co/Cu 5                            | 1 bar O <sub>2</sub> , 70°C, 16 h, without K <sub>2</sub> CO <sub>3</sub>  | 92 ± 2         | --          | 6                   |
| Co@NC-4                                | 1 bar O <sub>2</sub> , 60°C, 12 h, without K <sub>2</sub> CO <sub>3</sub>  | 99             | 98          | 7                   |
| Co@NOSC                                | O <sub>2</sub> ball, 60°C, 24 h, without K <sub>2</sub> CO <sub>3</sub>    | 97             | 98          | 8                   |
| Co@C-N(800)                            | 1 atm air, 25°C, 96 h, 4ml Hexane as solvent                               | 99             | 100         | 9                   |
| Au-Pd@HT-PO <sub>4</sub> <sup>3-</sup> | 1 atm O <sub>2</sub> , 55°C, 24 h, light intensity 0.5 W/cm <sup>2</sup>   | 76             | --          | 10                  |
| <b>CoCu@NC<sub>2</sub></b>             | <b>O<sub>2</sub> ball, 60°C, 12 h, without K<sub>2</sub>CO<sub>3</sub></b> | <b>100</b>     | <b>100</b>  | <b>Present work</b> |

## REFERENCES

- (1) L. Wang, J. Li, W. Dai, Y. Lv, Y. Zhang, S. Gao, *Green Chem.*, 2014, **16**, 2164-2173.
- (2) Y. X. Zhou, Y. Z. Chen, L. Cao, J. Lu, H. L. Jiang, *Chem. Commun.*, 2015, **51**, 8292-8295.
- (3) F. Mao, Z. Qi, H. Fan, D. Sui, R. Chen, J. Huang, *RSC Adv.*, 2017, **7**, 1498-1503.
- (4) R. V. Jagadeesh, H. Junge, M. M. Pohl, J. Radnik, A. Brückner, M. Beller, *J. Am. Chem. Soc.*, 2013, **135**, 10776-10782.
- (5) R. V. Jagadeesh, T. Stemmler, A. E. Surkus, M. Bauer, M. M. Pohl, J. Radnik, M. Beller, *Nat. Protoc.*, 2015, **10**, 916.
- (6) T. Yasukawa, X. Yang, S. Kobayashi, *Org. Lett.*, 2018, **20**, 5172-5176.
- (7) H. Su, K. X. Zhang, B. Zhang, H. H. Wang, Q. Y. Yu, X. H. Li, J. S. Chen, *J. Am. Chem.*

*Soc.*, 2017, **139**, 811-818.

(8) D. Nandan, G. Zoppellaro, I. Medřík, C. Aparicio, P. Kumar, M. Petr, R. Zbořil, *Green chem.*, 2018, **20**, 3542-3556.

(9) W. Zhong, H. Liu, C. Bai, S. Liao, Y. Li, *ACS Catal.*, 2015, **5**, 1850-1856.

(10) Q. Xiao, Z. Liu, A. Bo, S. Zavahir, S. Sarina, S. Bottle, H. Zhu, *J. Am. Chem. Soc.*, 2015, **137**, 1956-1966.
